# Supplementary material for: Sequence Recombination and Conservation of Varroa destructor Virus-1 and Deformed Wing Virus in Field Collected Honey Bees (Apis mellifera)
Source: PubMed Central journal article supplement (PMC3776811; doi:10.1371/journal.pone.0074508), 2013-09-18
Supplement: pone.0074508.s003.pdf [file pone.0074508.s003.pdf]

Figure S3: Count of reads aligned to DWV, VDV-1 and KV

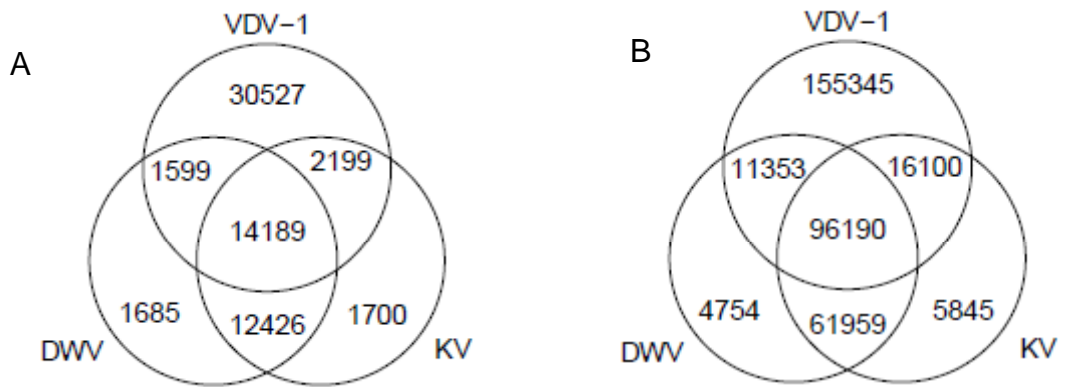

Panel A & B: Counts of reads matched with max mismatch number =2. (A: unique number, B: total number)

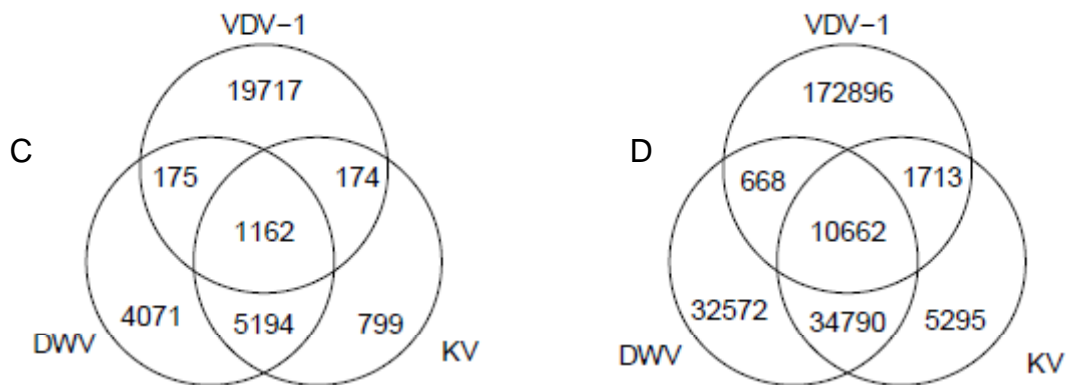

Panel C & D: Counts of reads perfectly matched. (C: unique number, D: total number)
