# Supplementary material for: Sequence Recombination and Conservation of Varroa destructor Virus-1 and Deformed Wing Virus in Field Collected Honey Bees (Apis mellifera)
Source: PubMed Central journal article supplement (PMC3776811; doi:10.1371/journal.pone.0074508), 2013-09-18

Figure S5: Neighbour Joint consensus tree of Iflavirus genomes.

The tree was constructed using 1000 bootstrap. Triangle labels the VDV-1/DWV/KV clade

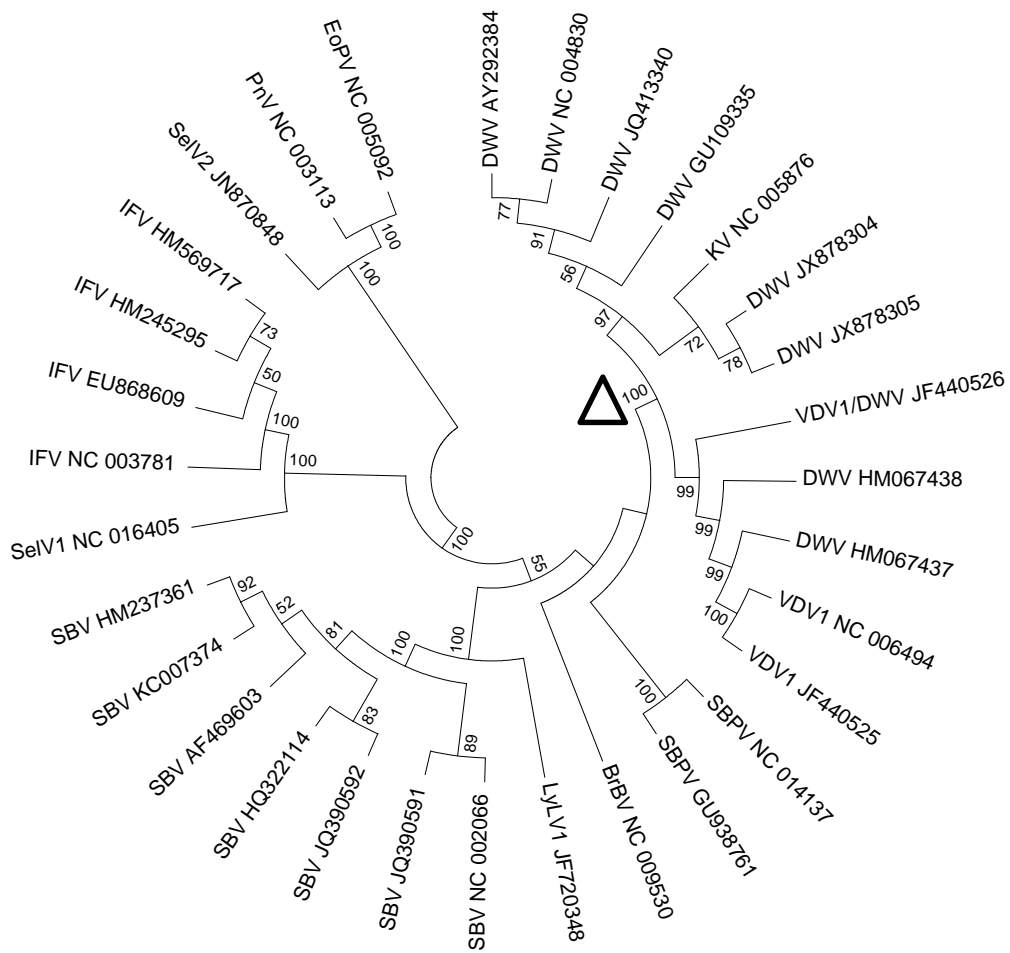

Supplement: pone.0074508.s005.pdf [file pone.0074508.s005.pdf]
