# Supplementary material for: Sequence Recombination and Conservation of Varroa destructor Virus-1 and Deformed Wing Virus in Field Collected Honey Bees (Apis mellifera)
Source: PubMed Central journal article supplement (PMC3776811; doi:10.1371/journal.pone.0074508), 2013-09-18
Supplement: pone.0074508.s008.pdf [file pone.0074508.s008.pdf]

Table S2: Number and percentage of reads mapped to the three reference sequences

| Reference       | Mismatch<=2    |               | Mismatch=0     |               |
|-----------------|----------------|---------------|----------------|---------------|
|                 | Unique_num (%) | Total_num (%) | Unique_num (%) | Total_num (%) |
| NC_004830_DWV   | 29899(2.76)    | 174256(0.18)  | 10602(0.98)    | 78692(0.08)   |
| NC_005876_KV    | 30514(2.82)    | 180094(0.19)  | 7329(0.68)     | 52460(0.06)   |
| NC_006494_VDV-1 | 48514(4.48)    | 278988(0.29)  | 21228(1.96)    | 185939(0.20)  |
